# Supplementary material for: Remote Monitoring of Colorectal Cancer Survivors Using a Smartphone App and Internet of Things–Based Device: Development and Usability Study
Source: PubMed Central journal article supplement (PMC9978953; doi:10.2196/42250), 2023-02-15

## Multimedia Appendix 1

**Figure S1.** The general architecture and technologies used in the system development.

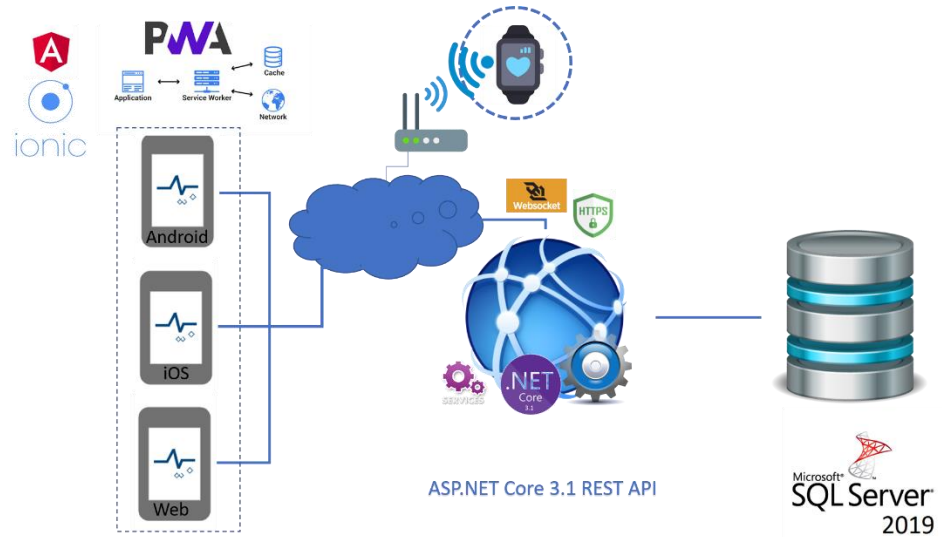

**Figure S2.** Process of hardware design. (A) Hardware designed on the bread board, (B) soldered parts on the board, and (C) assembled hardware.

(A)

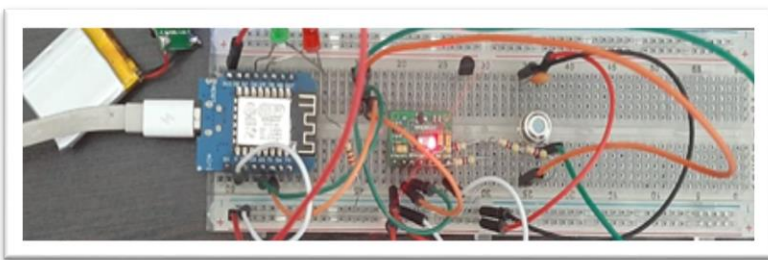

(B)

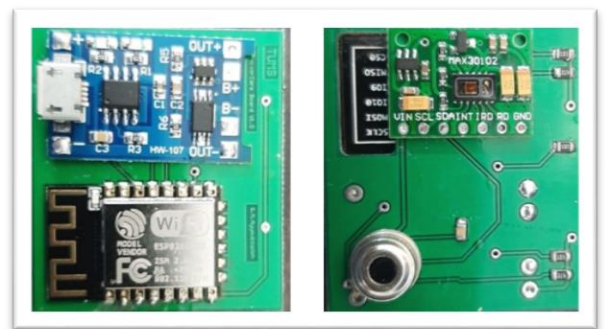

(C)

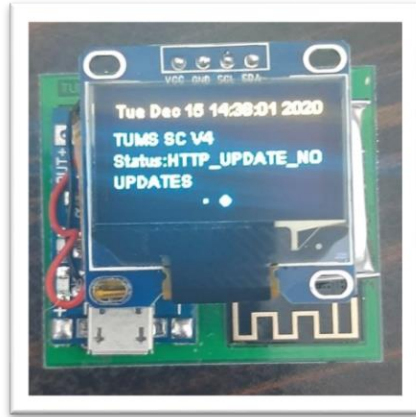

**Figure S3.** The wristband. (A) Preliminary design of the wristband case and (B) the final wristband.

(A)

(B)

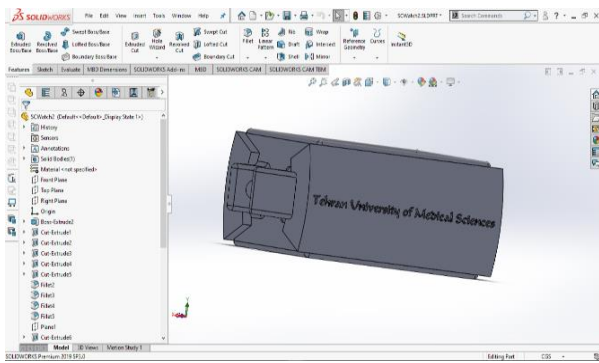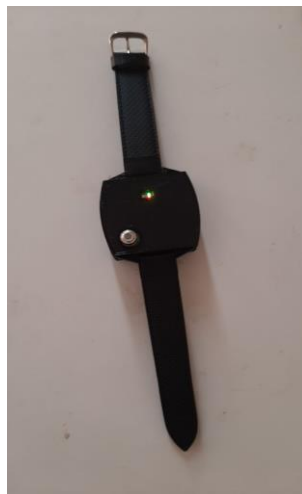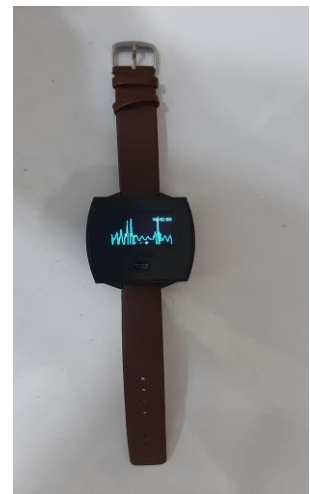

Supplement: cancer_v9i1e42250_app1.pdf [file cancer_v9i1e42250_app1.pdf]
